# Supplementary material
Source: publisher site journal article supplement (https://www.dovepress.com/article/496746)
Supplement: Supplementary file 1 [file get_supplementary_file.php]

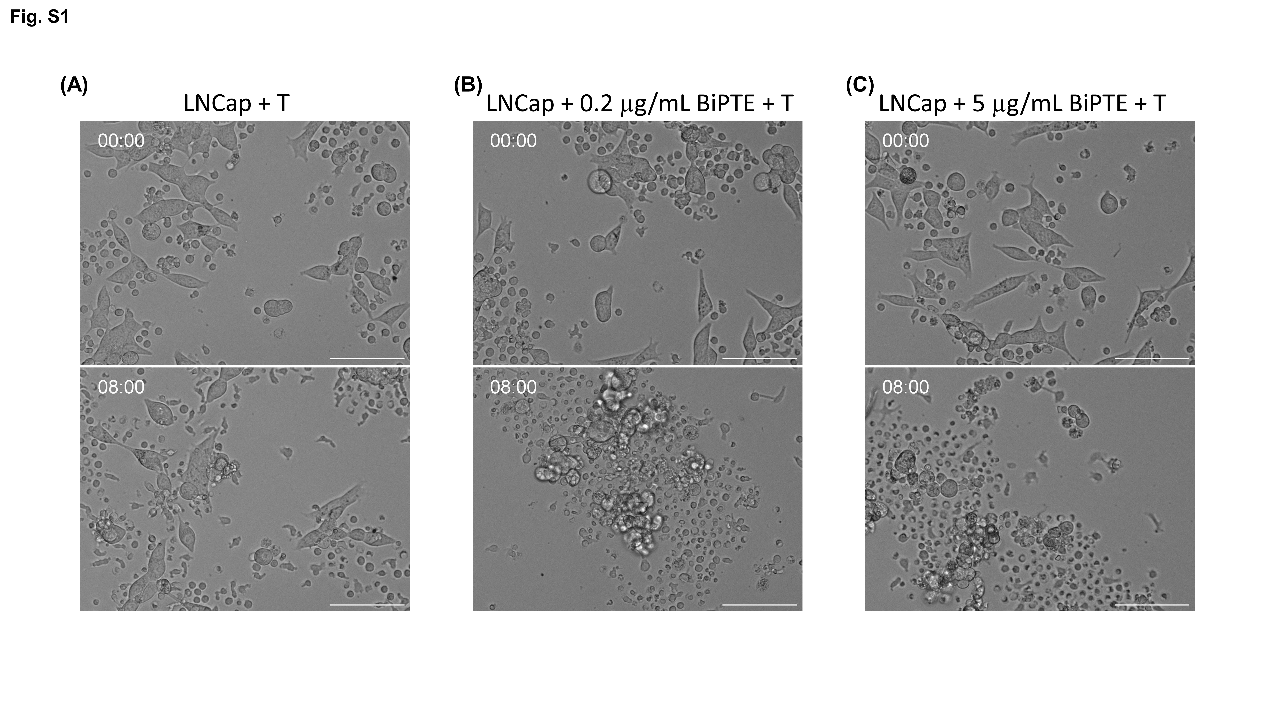


**Figure S1.** Video screenshots of LNCaP cells and T cells co-cultured for 16 h. (A) Co-culture only; (B) co-culture with a low concentration of BiPTE; and (C) co-culture with a high concentration of BiPTE.


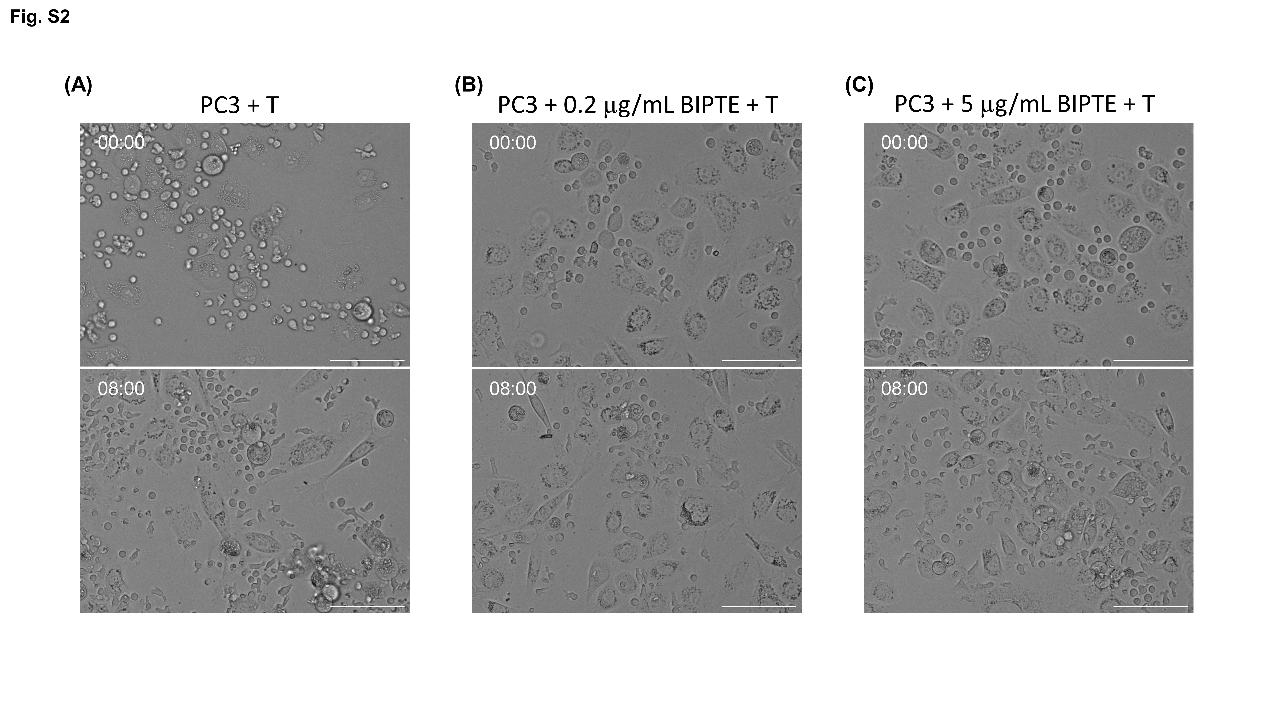


**Figure S2.** Video screenshots of PC3 cells and T cells co-cultured for 16 h. (A) Co-culture only; (B) co-culture with a low concentration of BiPTE; and (C) co-culture with a high concentration of BiPTE.


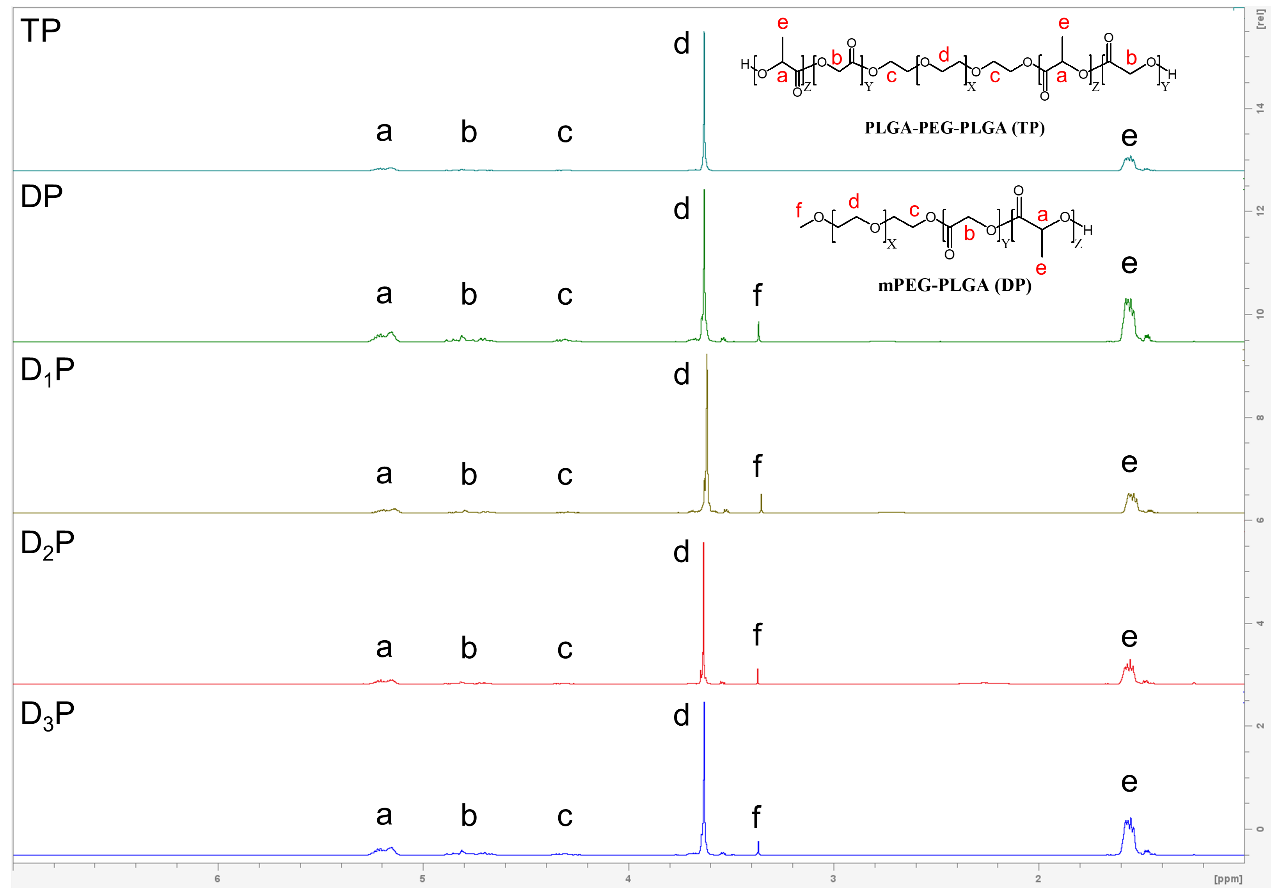


**Figure S3.** The 1H-NMR spectrum of mPEG–PLGA (DP) and PLGA–PEG–PLGA (TP).


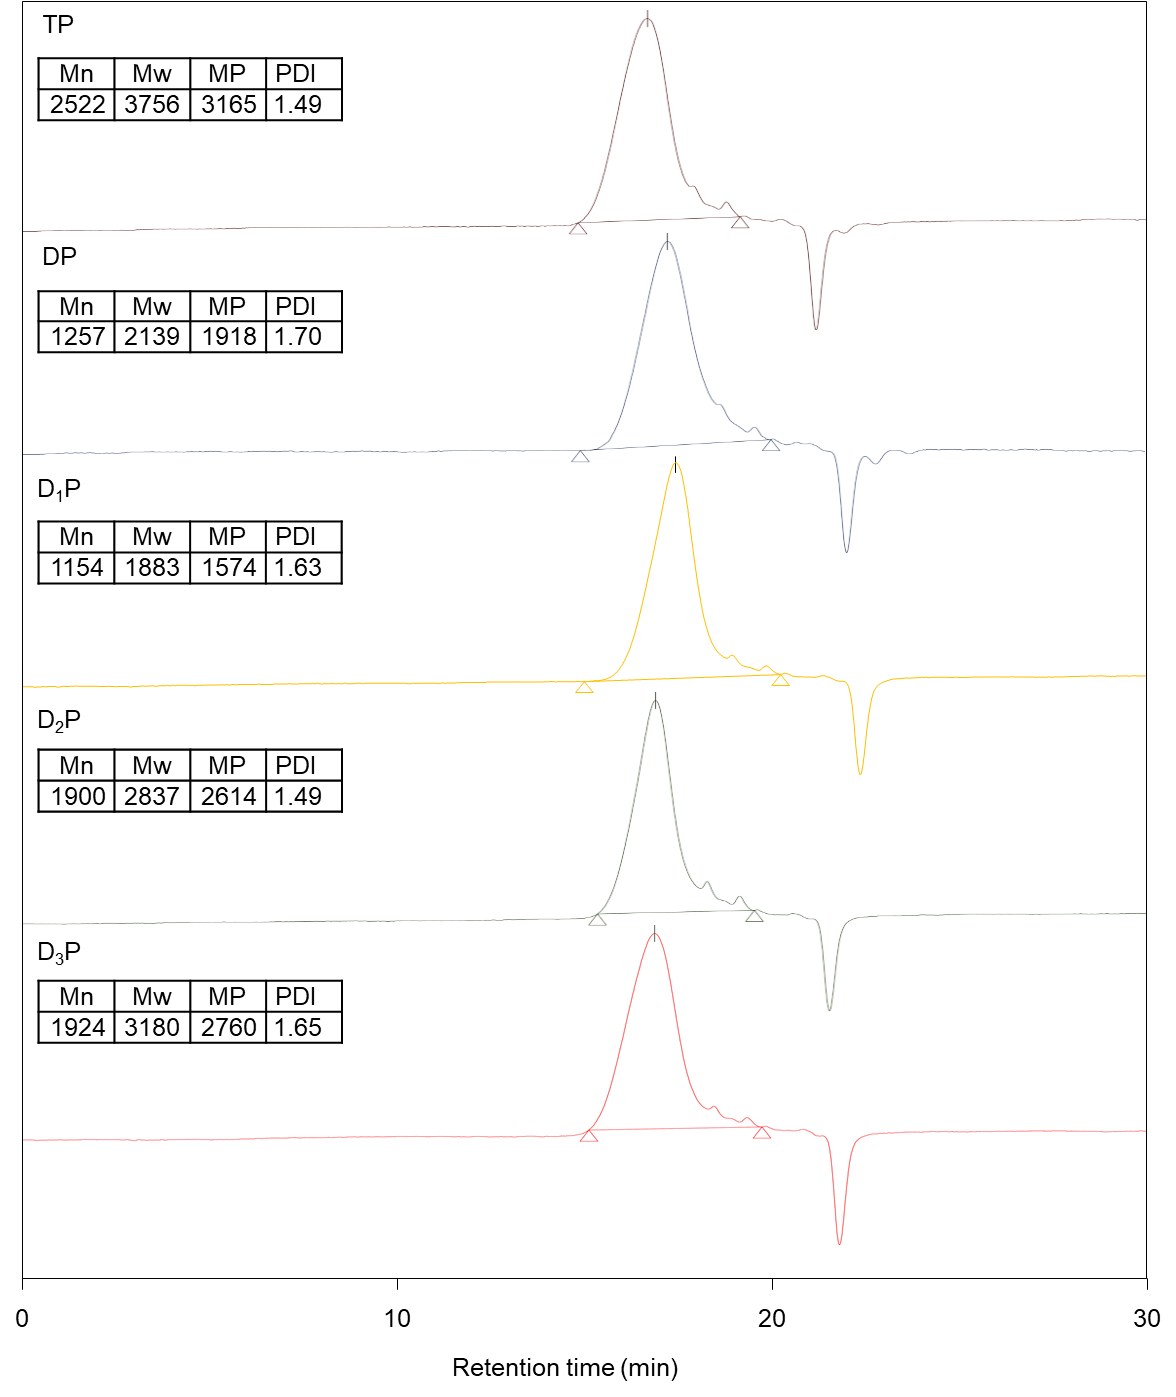


**Figure S4.** The GPC analysis of mPEG–PLGA (DP) and PLGA–PEG–PLGA (TP).


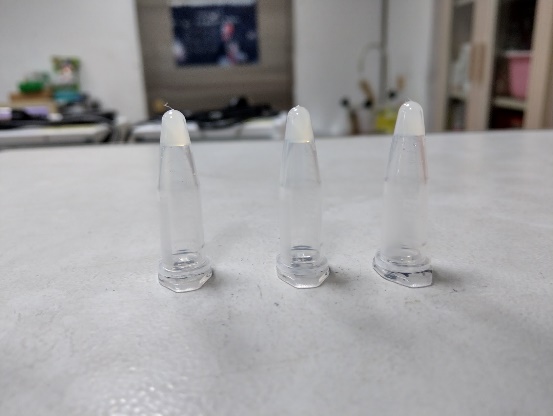


**Figure S5**. Image of the sample in the gelling type after inversion.

**Figure S6**. In the equation , linear regression was performed for the release profiles of each nsTPPgel group. For each group, 4–6 time points were used to achieve the maximum 𝑅2 value.


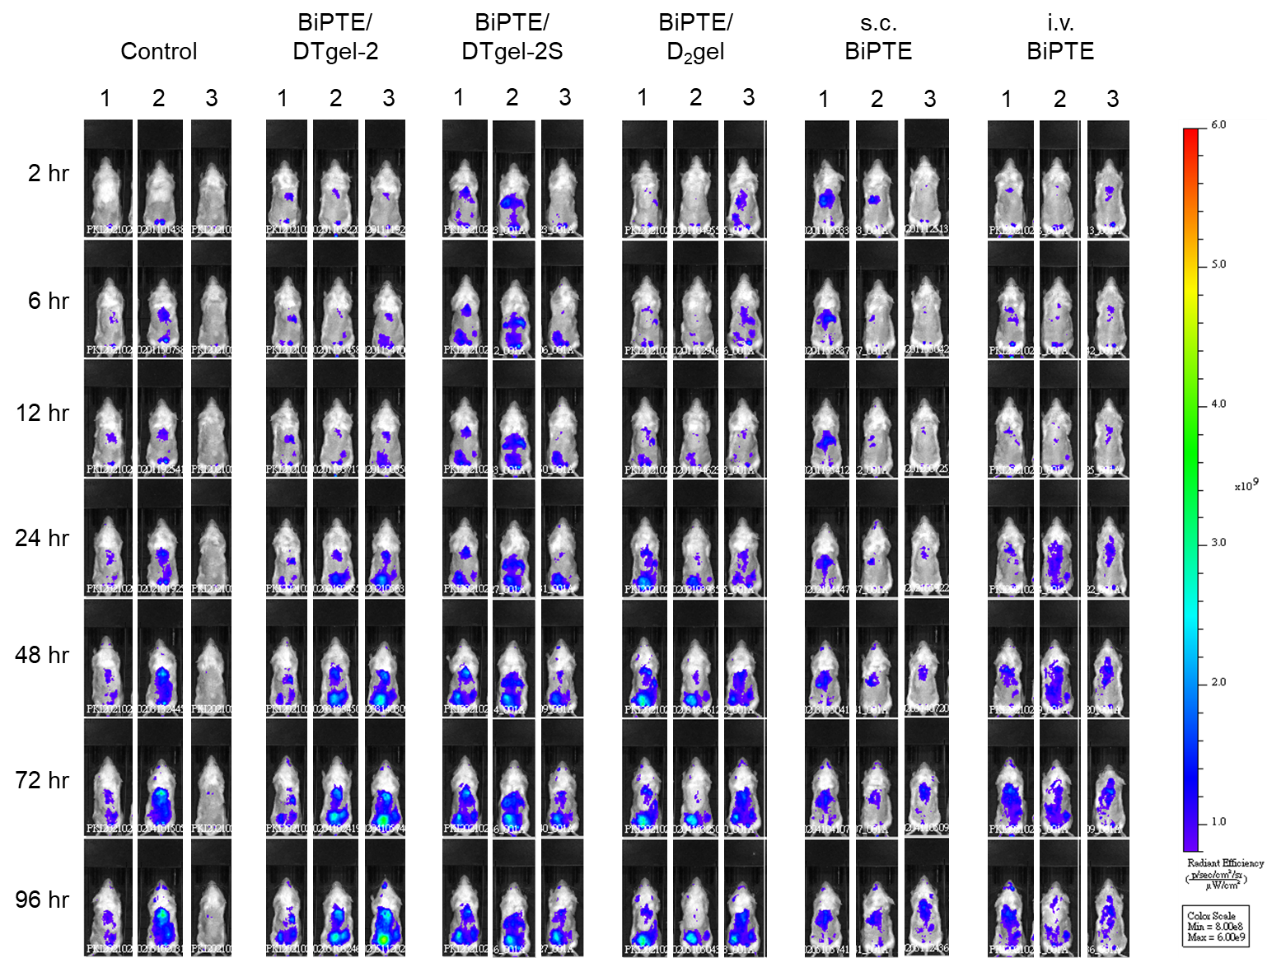
**Figure S7.** In vivo images of LNCaP-xenograft mice injected with DiR-labeled a-huPBMCs after being administrated intravenous (i.v.) BiPTE sol, subcutaneous (s.c.) BiPTE sol, BiPTE/DTgel-2, BiPTE/DTgel-2S, and BiPTE/D2gel (at 5 mg/kg body weight) at 2, 6, 12, 24, 52, 72 and 96 h, obtained with an IVIS spectrum optical imaging system.


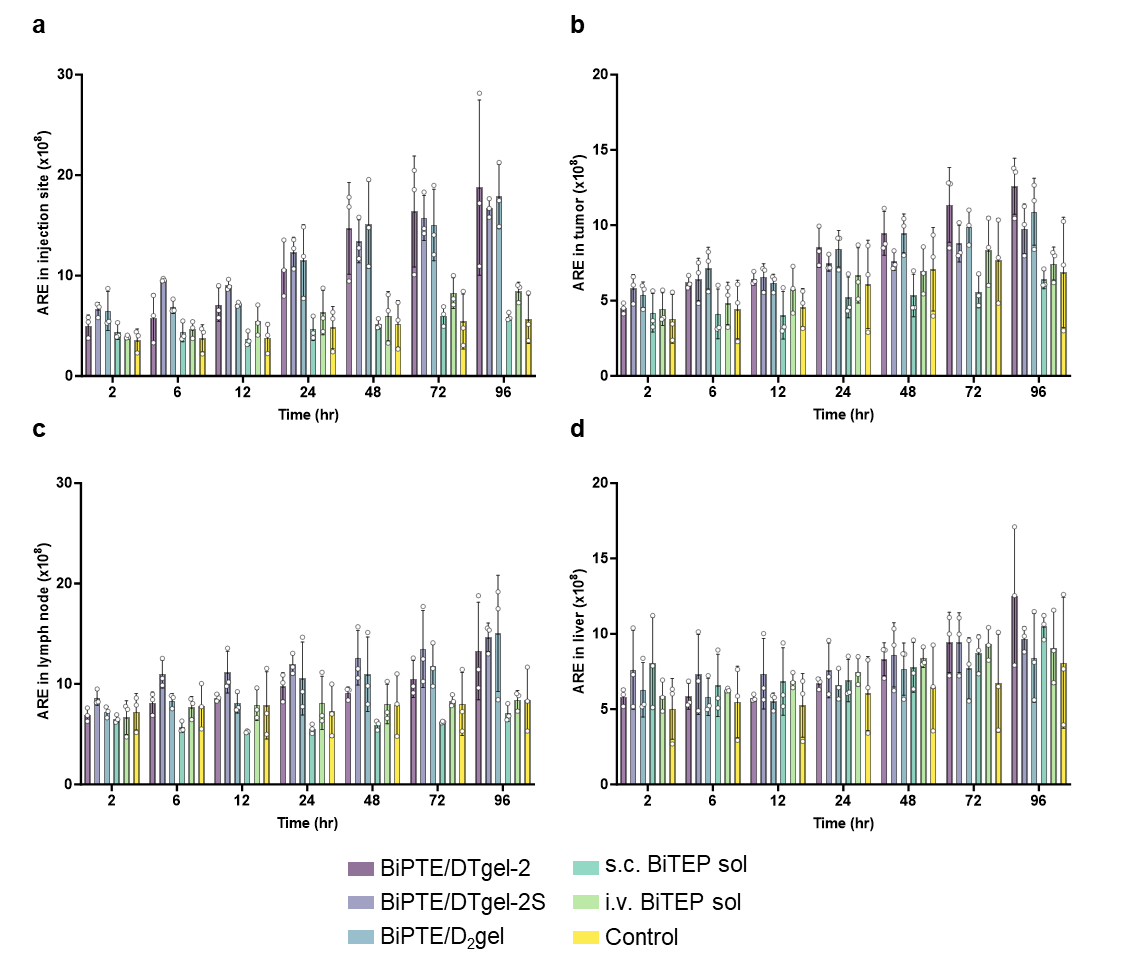
**Figure S8.** Average radiant efficiencies (ARE) of DiR-labeled a-huPBMCs in the injection site (**a**), tumor site (**b**), lymph nodes (**c**), and liver (**d**) at 2, 6, 12, 24, 52, 72, and 96 h. Data are expressed as mean ± standard deviation (n = 3).

| **Table S1.** The formulations of 15% and 20% BSA or /nsTPPgel. | | | | | | |
| --- | --- | --- | --- | --- | --- | --- |
| Formulation | 25% TP (µL) | 25% DP (µL) | PBS  (µL) | 10× PBS (µL) | BSA  (µg) | BiPTE  (µg) |
| 20% DTgel-2 | 240 | 160 | 100 | 0 | 500 | - |
| 20% DTgel-2S | 240 | 160 | 73 | 27 | - |
| 20% D2gel | 0 | 400 | 100 | 0 | - |
| 15% DTgel-2 | 180 | 120 | 200 | 0 | 500 |
| 15% DTgel-2S | 180 | 120 | 173 | 27 | 500 |
| 15% D2gel | 0 | 300 | 200 | 0 | 500 |
| BiPTE, bispecific anti-PSMA Fab/anti-CD3 scFv T cell engager; BSA, bovine serum albumin; DP, diblock copolymer; PBS, phosphate-buffered saline; TP, triblock copolymer | | | | | | |

| **Table S2.** The gelling temperature and storage modulus (G′) of each *nsTPPgel* formulation. | | |
| --- | --- | --- |
| Formulation | Gelling temperature (°C) | G’ (Pa) at 37 °C |
| 20% DTgel-2 | 29.5 | 61.7 |
| 20% DTgel-2S | 22.3 | 185.2 |
| 20% D2gel | 21.2 | 162.5 |
| 15% DTgel-2 | 30.5 | 51.8 |
| 15% DTgel-2S | 30.5 | 52.0 |
| 15% D2gel | 29.5 | 67.4 |

| **Table S3.** The tumor volume of each group on day 0, day 14, and day 21. Data are expressed as mean ± SD (n = 4). The statistical differences were analyzed using one-way ANOVA followed by Tukey post hoc test for comparisons between groups. | | | |
| --- | --- | --- | --- |
| Group | Day 0 tumor volume (mm3) | Day 14 tumor volume (mm3) | Day 21 tumor volume (mm3) |
| Control | 84.5±38.6 | 243.3±121.2 | 443.4±145.1 |
| i.v. BiPTE solution | 82.5±33.2 | 233.4±132.3 | 309.2±117.7 |
| s.c. BiPTE solution | 81.3±34.2 | 200.2±65.5 | 275.1±64.7 |
| BiPTE/DTgel-2 | 80.6±23.4 | 96.9±54.3 | 181.6±87.6* |
| BiPTE/DTgel-2S | 77.0±24.5 | 39.4±16.8*, # | 91.9±16.1** |
| BiPTE/D2gel | 79.4±29.3 | 29.4±21.6*, # | 32.5±20.8***, #, † |
| *p < 0.05, **p < 0.01, and ***p < 0.001 compared to the control group in one-way ANOVA.  #p < 0.05 compared to intravenous (i.v.) BiPTE solution group in one-way ANOVA.  †p < 0.05 compared to subcutaneous (s.c.) BiPTE solution group in one-way ANOVA. | | | |
